# Supplementary material for: Layer-controlled evolution of electron state in the silicene intercalation compound SrSi2
Source: Royal Society of Chemistry journal article supplement (doi:10.1039/d2mh00640e), 2022-01-01
Supplement: d2mh00640e1.pdf [file d2mh00640e1.pdf]

## Supporting Information

# Layer-controlled evolution of electron state in the silicene intercalation compound SrSi<sub>2</sub>

*Oleg E. Parfenov, Alexander N. Taldenkov, Dmitry V. Averyanov, Ivan S. Sokolov,  
Oleg A. Kondratev, Mikhail M. Borisov, Sergey N. Yakunin, Igor A. Karateev,  
Andrey M. Tokmachev and Vyacheslav G. Storchak*

National Research Center “Kurchatov Institute”, Kurchatov Sq. 1, Moscow 123182, Russia

### **Contents:**

**Figure S1.** Match of Si(111) and SrSi<sub>2</sub> lattices based on RHEED

**Figure S2.** XRD scans of ultrathin SrSi<sub>2</sub> films

**Figure S3.** Electron microscopy images of film interfaces

**Figure S4.** Electron microscopy images of ultrathin SrSi<sub>2</sub> films

**Figure S5.** Carrier mobilities and concentrations in SrSi<sub>2</sub>

**Figure S6.** Independence of results on the electrical scheme

**Figure S7.** Weak antilocalization vs. chiral anomaly

**Figure S8.** Dependence of resistivity on out-of-plane rotation of magnetic field

**Figure S9.** Dependence of conductivity on in-plane rotation of magnetic field

**Figure S10.** Longitudinal magnetoconductance in 3 ML SrSi<sub>2</sub>

**Figure S11.** Temperature dependence of resistivity for different thicknesses

**Figure S12.** Magnetoresistance of 8 ML SrSi<sub>2</sub>

**Figure S13.** Magnetoresistance of 10 ML SrSi<sub>2</sub>

**Figure S14.** Carrier mobilities and concentrations in 140 nm SrSi<sub>2</sub>

**Figure S15.** Carrier mobilities and concentrations in 10 ML SrSi<sub>2</sub>

**Figure S16.** Magnetoresistance of 30 nm SrSi<sub>2</sub>

**Figure S17.** Interplay of weak localization and chiral anomaly

**Figure S18.** Two-terminal measurement scheme

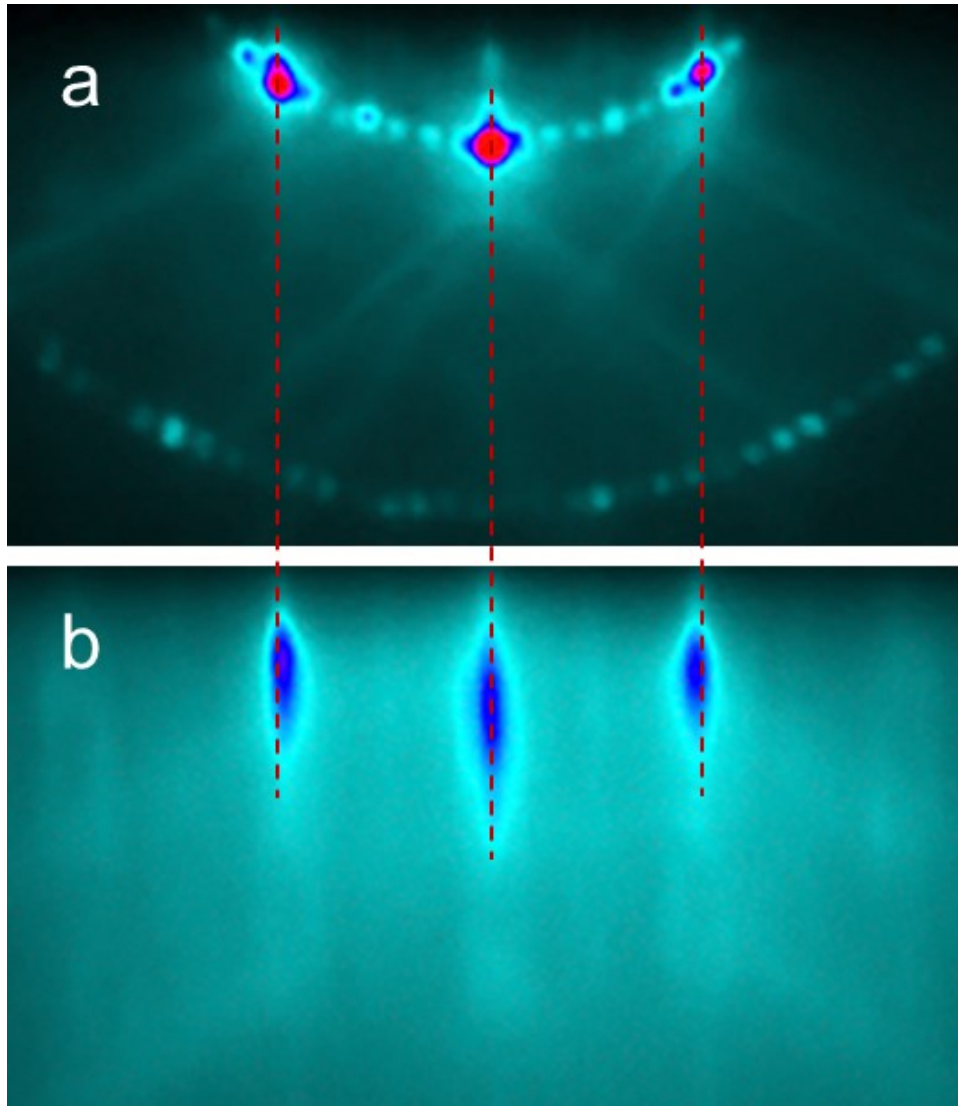

**Figure S1.** RHEED images along the  $[1\bar{1}0]$  azimuth of the Si substrate. a) Reconstructed Si(111) surface. b) A film of SrSi<sub>2</sub> ( $d = 160$  nm). The lattice match between the lateral lattice parameters of Si(111) and SrSi<sub>2</sub> is highlighted by red dashed lines.

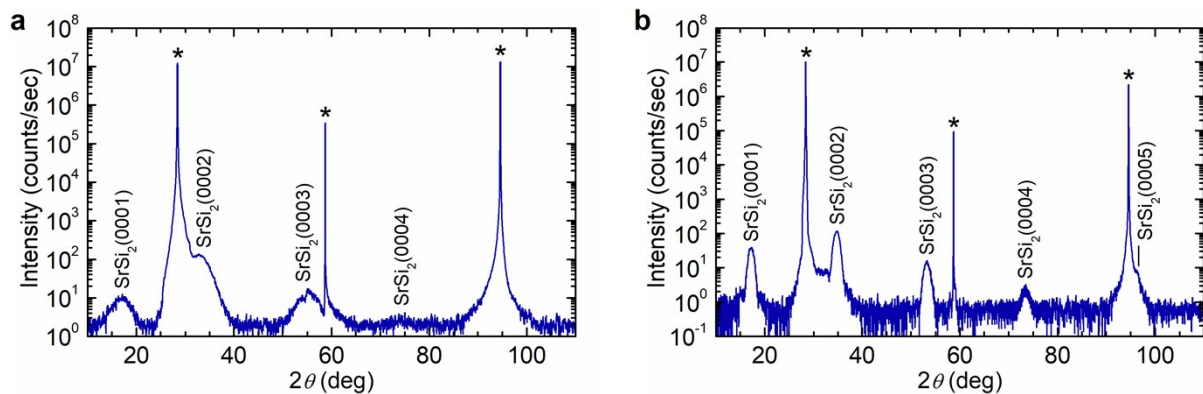

**Figure S2.**  $\theta$ - $2\theta$  XRD scans of ultrathin  $\text{SrSi}_2$  films (the  $\theta$  angles are scaled to the  $\text{Cu K}\alpha_1$  wavelength to facilitate comparison with Fig. 1c): a) 3 ML and b) 8 ML; asterisks mark peaks from the substrate.

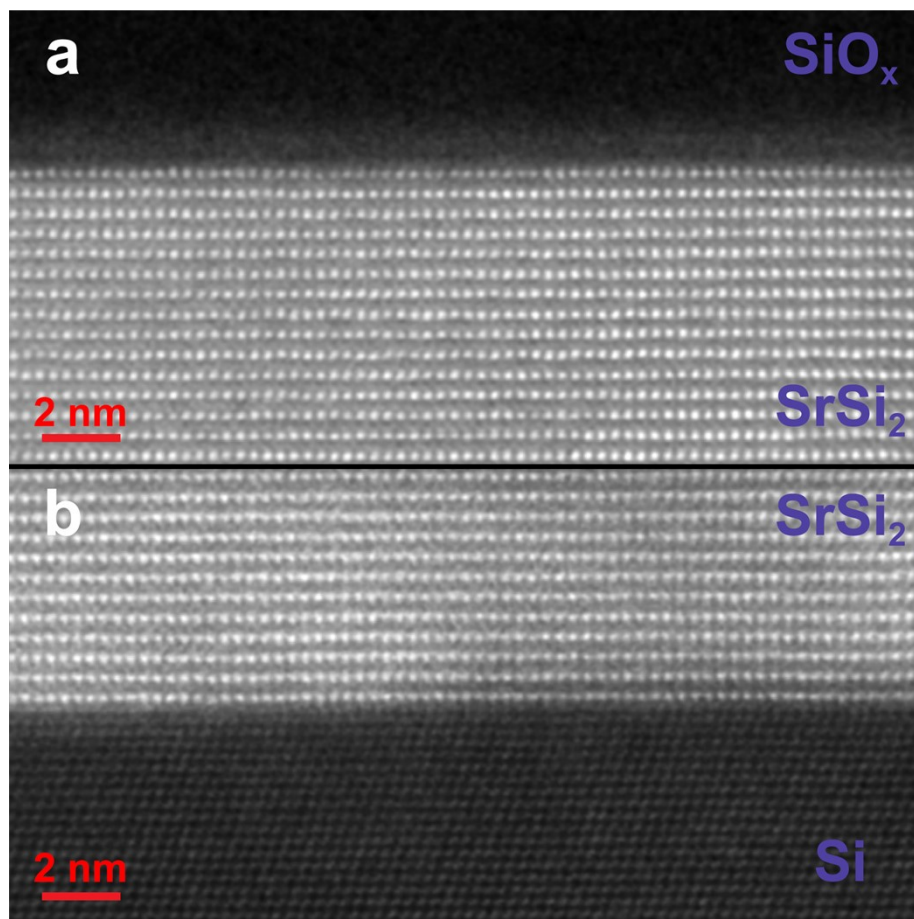

**Figure S3.** Cross-sectional HAADF-STEM images of interfaces in  $\text{SiO}_x/\text{SrSi}_2/\text{Si}(111)$ : a) the  $\text{SiO}_x/\text{SrSi}_2$  interface; b) the  $\text{SrSi}_2/\text{Si}(111)$  interface. Both images are viewed along the  $[110]$  zone axis of the Si substrate.

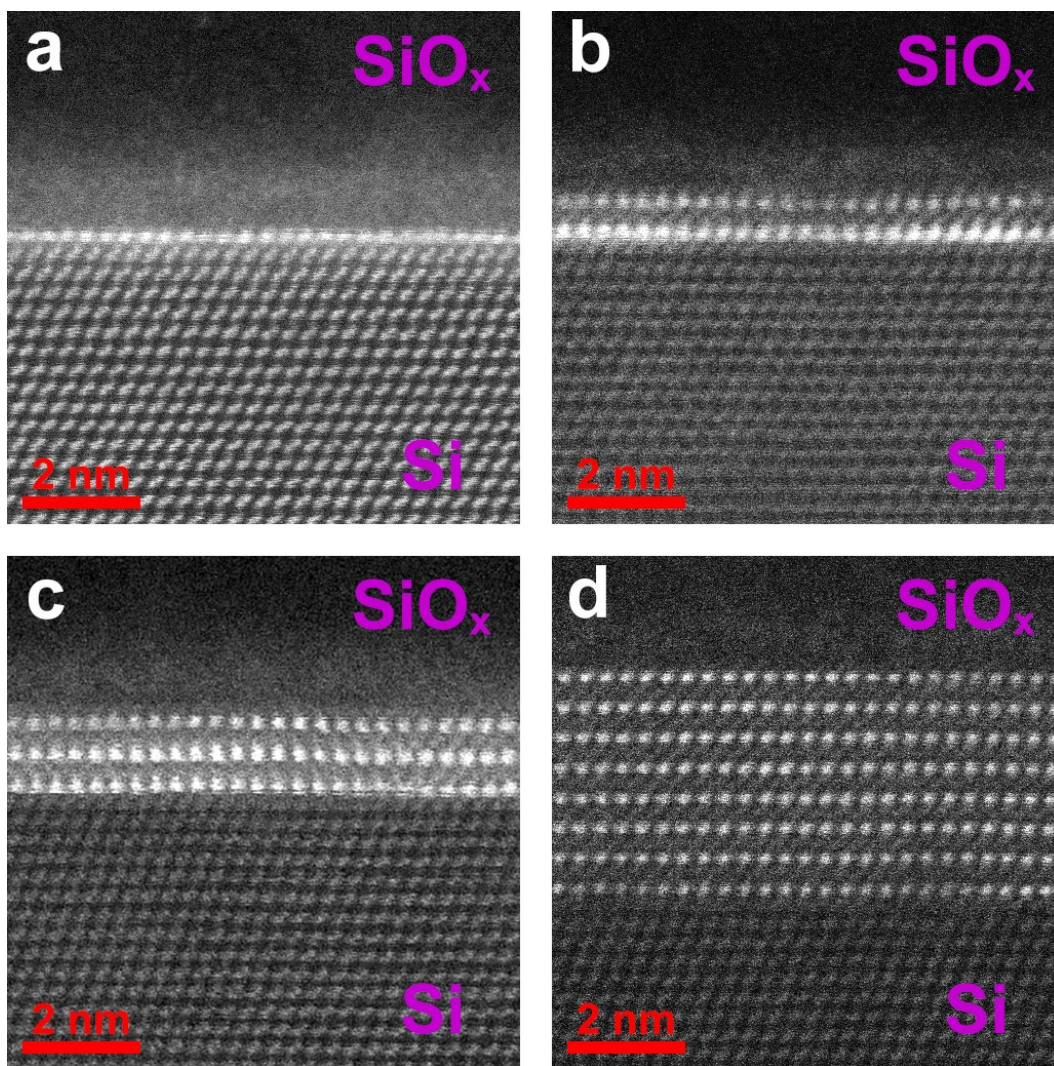

**Figure S4.** Cross-sectional HAADF-STEM images of ultrathin SrSi<sub>2</sub> films on Si(111): a) 1 ML; b) 2 ML; c) 3 ML; d) 8 ML. The images are viewed along the [110] zone axis of the Si substrate. Bright points correspond to Sr atoms.

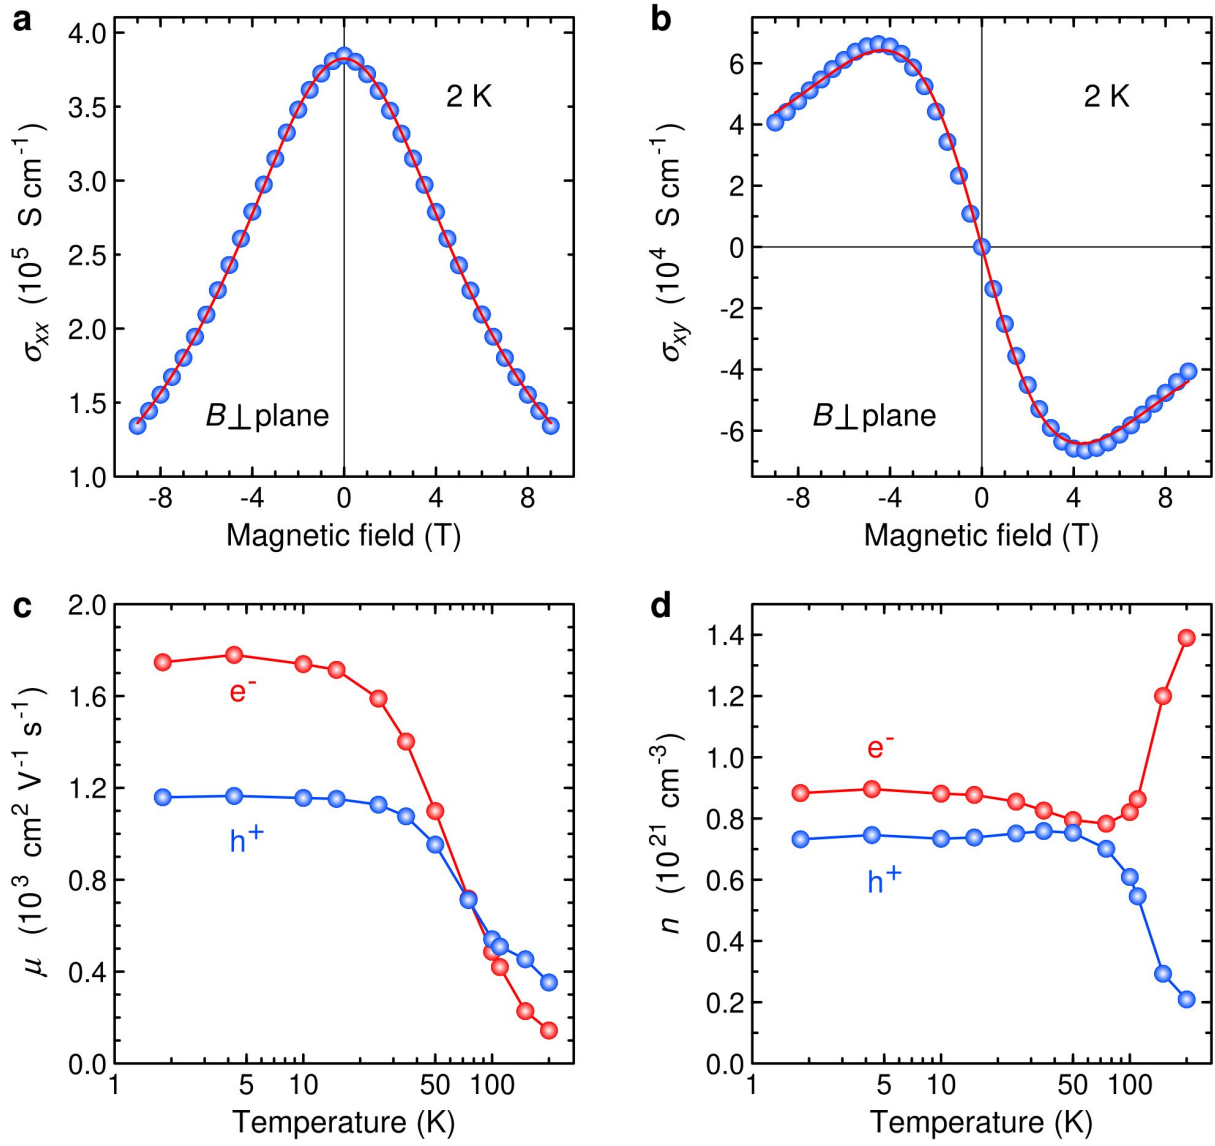

**Figure S5.** Electron transport in a thick SrSi<sub>2</sub> film ( $d = 160 \text{ nm}$ ). a) Longitudinal and b) transverse conductance at 2 K in out-of-plane magnetic field; red lines provide fits of the data by a two-band model. Temperature dependence of c) carrier mobility and d) carrier concentration for the electron (red) and hole (blue) bands.

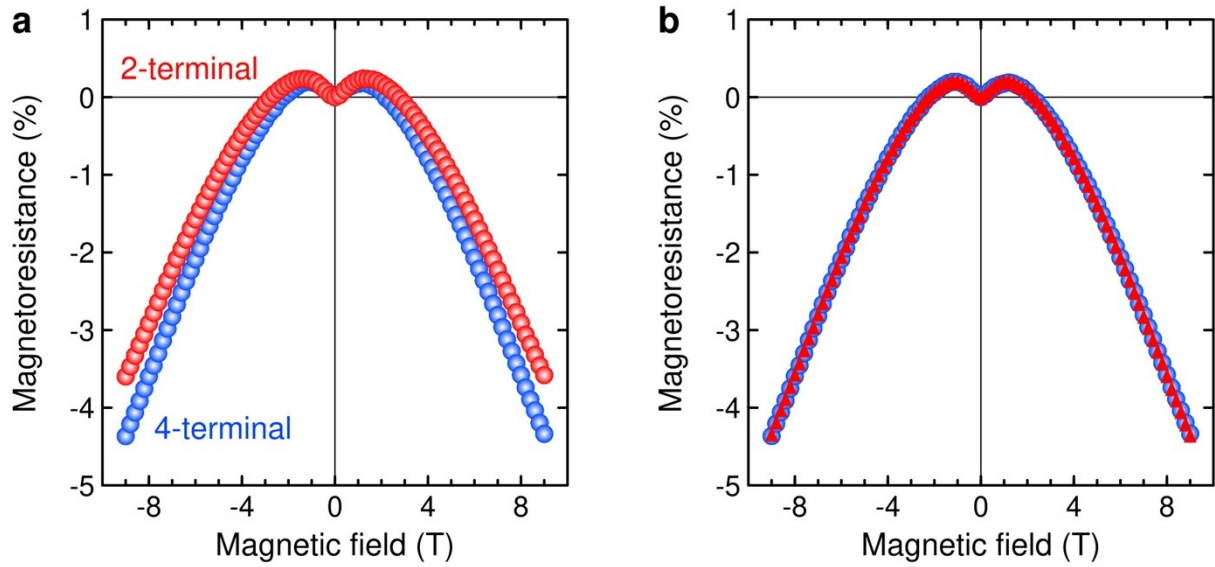

**Figure S6.** Electrical scheme dependence of magnetoresistance of a thick SrSi<sub>2</sub> film ( $d = 160$  nm) at 2 K in magnetic field parallel to the current: a) 2-terminal (red) vs. 4-terminal (blue); b) interchange of potential and current contacts.

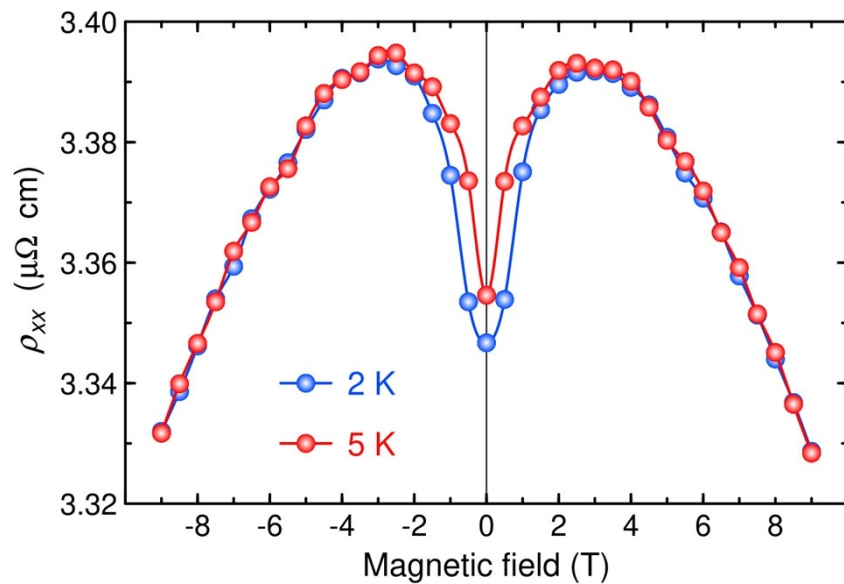

**Figure S7.** Resistivity of a thick SrSi<sub>2</sub> film ( $d = 160$  nm) at  $T = 2$  K (blue) and  $T = 5$  K (red) in magnetic field parallel to the current.

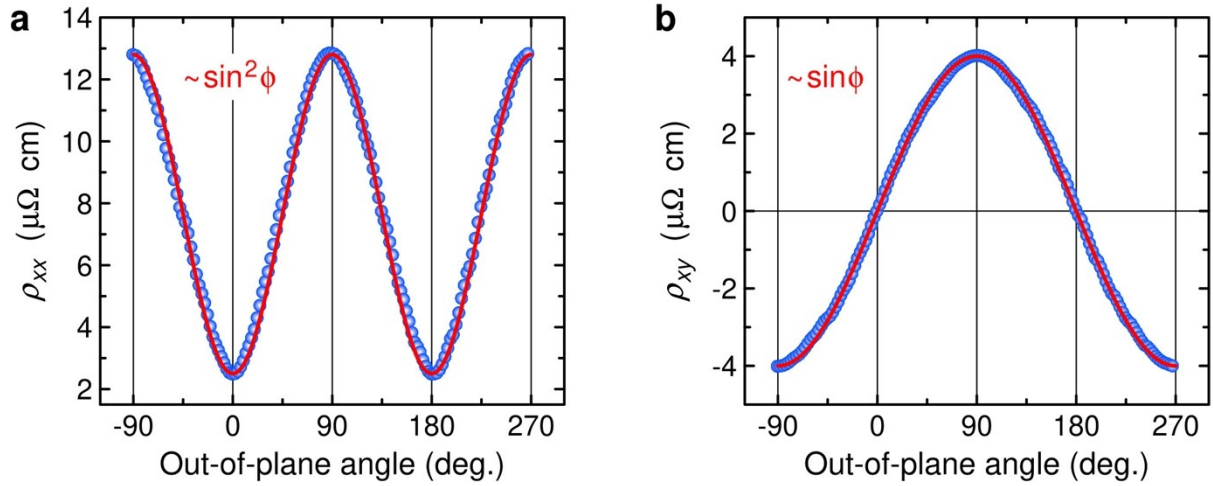

**Figure S8.** Dependence of a) longitudinal and b) transverse resistivity in a thick  $\text{SrSi}_2$  film ( $d = 160 \text{ nm}$ ) at  $T = 2 \text{ K}$  on the angle  $\phi$  between an out-of-plane magnetic field (with in-plane projection along the current direction) of 14 T and the current direction (blue dots) and their respective fits as  $\text{const} \cdot \sin^2 \phi$  and  $\text{const} \cdot \sin \phi$  (red lines).

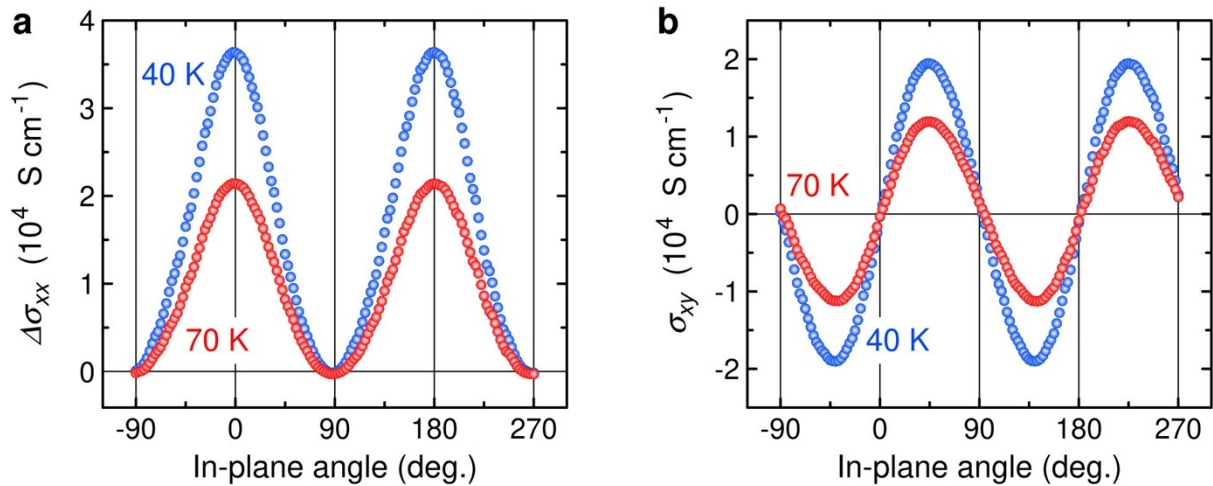

**Figure S9.** Dependence of a) longitudinal and b) transverse conductivity in a thick  $\text{SrSi}_2$  film ( $d = 160 \text{ nm}$ ) at 40 K (blue) and 70 K (red) on the angle  $\theta$  between an in-plane magnetic field of 14 T and the current direction.

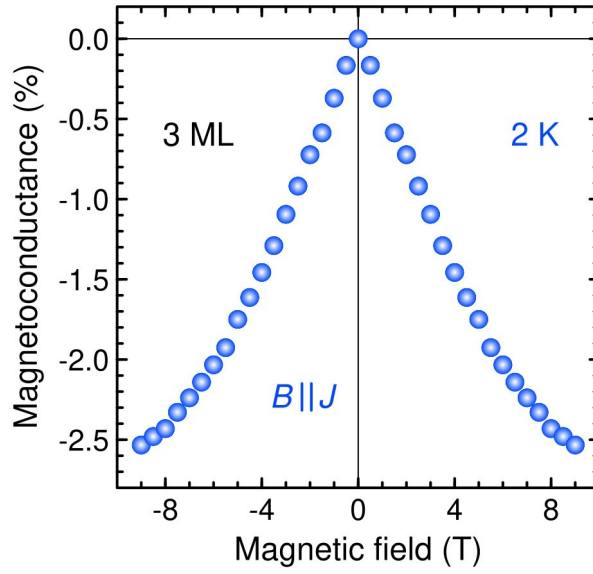

**Figure S10.** Magnetoconductance in 3 ML SrSi<sub>2</sub> at  $T = 2$  K in magnetic field parallel to the current.

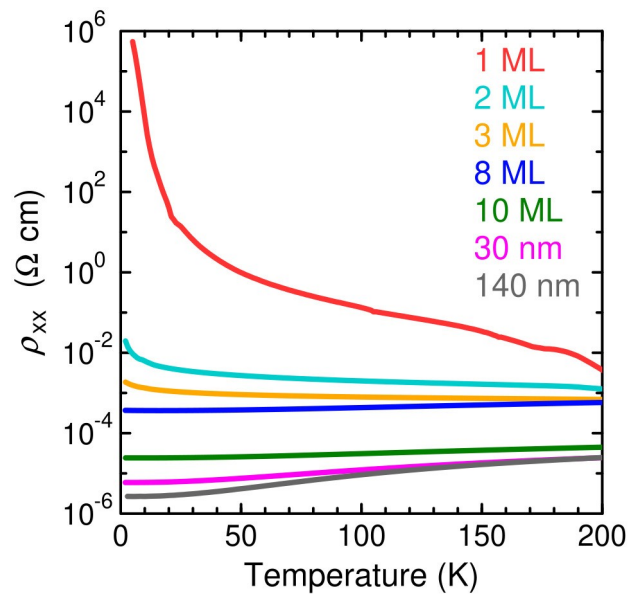

**Figure S11.** Temperature dependence of resistivity in SrSi<sub>2</sub> films of different thickness: 1 ML (red), 2 ML (cyan), 3 ML (orange), 8 ML (blue), 10 ML (green), 30 nm (magenta), and 140 nm (grey).



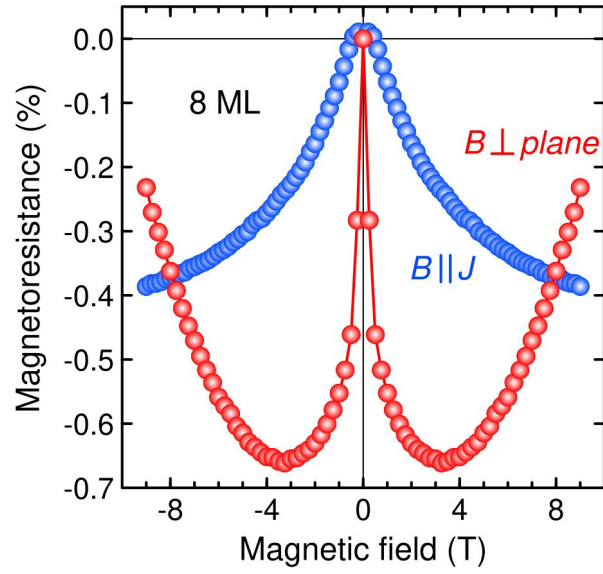

**Figure S12.** Magnetoresistance of 8 ML SrSi<sub>2</sub> at  $T = 2$  K in magnetic fields directed in-plane (parallel to the current, blue) and out-of-plane (red).

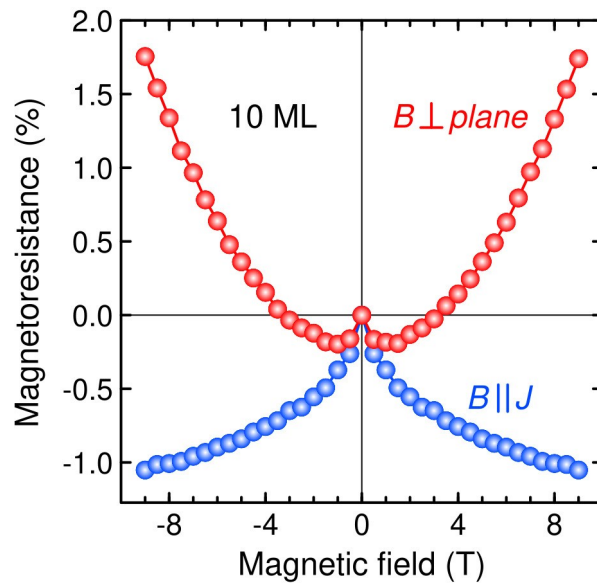

**Figure S13.** Magnetoresistance of 10 ML SrSi<sub>2</sub> at  $T = 2$  K in magnetic fields directed in-plane (parallel to the current, blue) and out-of-plane (red).

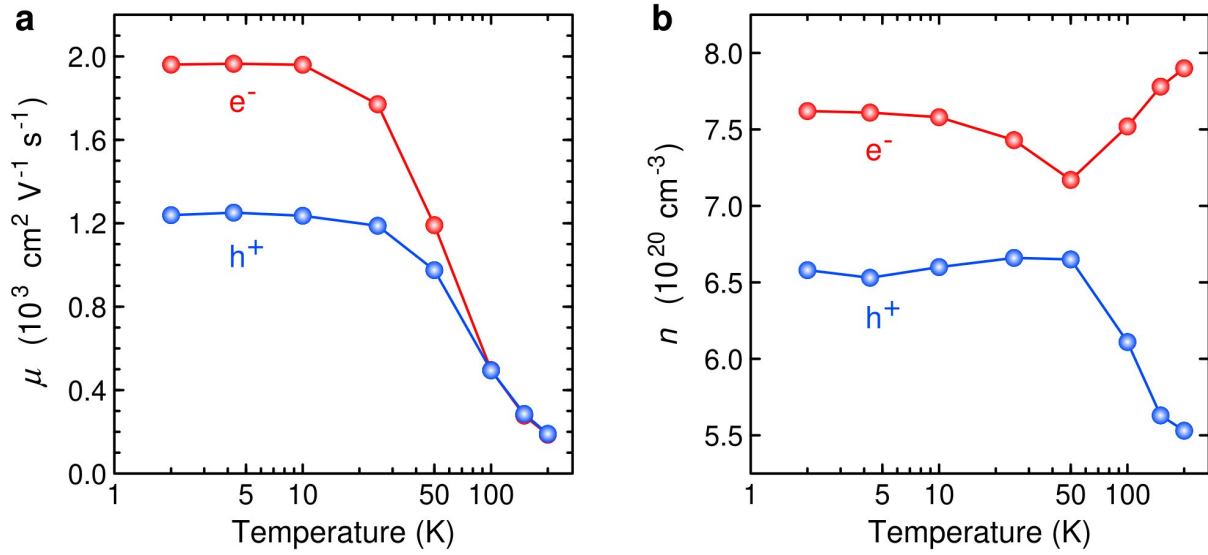

**Figure S14.** Temperature dependence of a) carrier mobility and b) carrier concentration for electrons (red) and holes (blue) in 140 nm SrSi<sub>2</sub>.

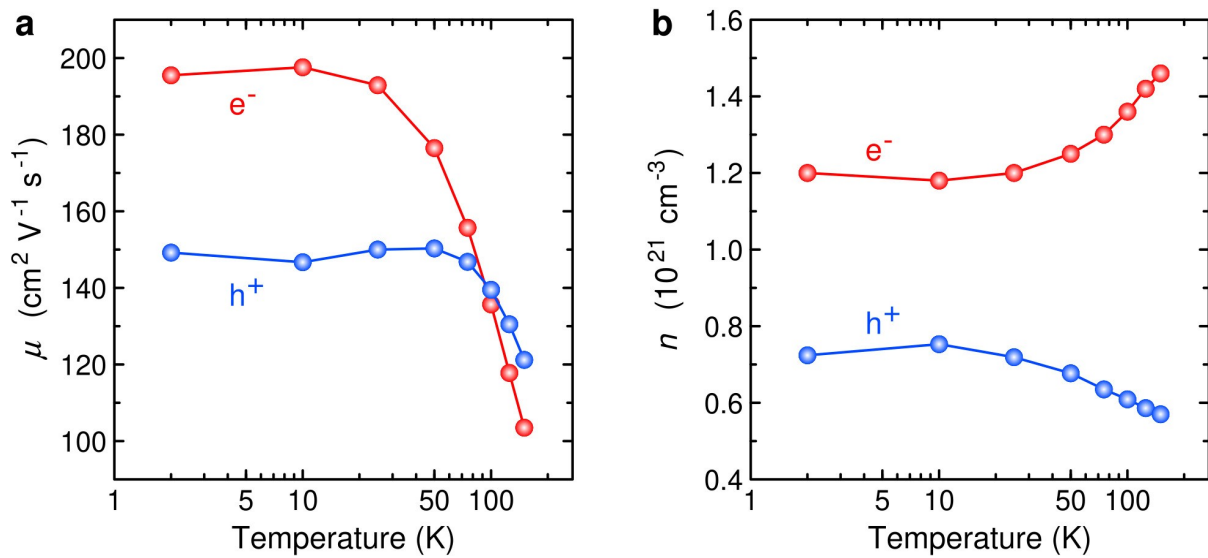

**Figure S15.** Temperature dependence of a) carrier mobility and b) carrier concentration for electrons (red) and holes (blue) in 10 ML SrSi<sub>2</sub>.

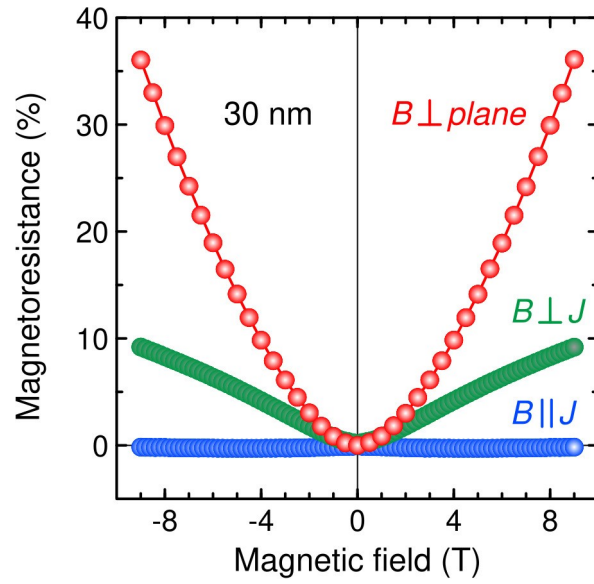

**Figure S16.** Magnetoresistance of 30 nm SrSi<sub>2</sub> at  $T = 2$  K in in-plane magnetic field, parallel (blue) and orthogonal (green) to the current, and out-of-plane magnetic fields (red).

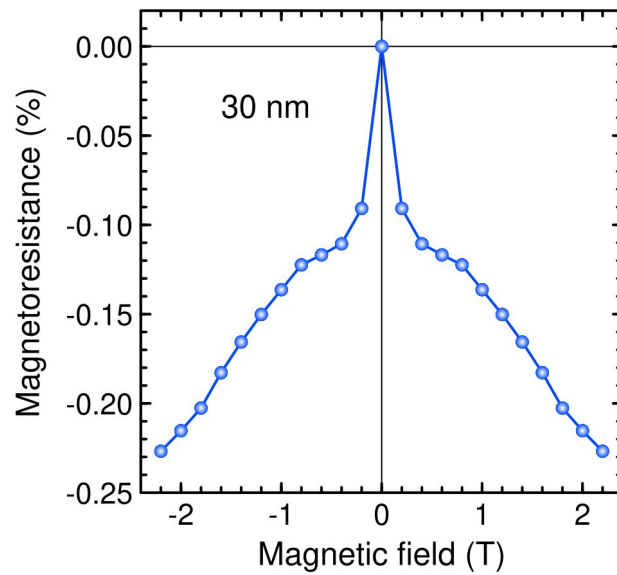

**Figure S17.** Magnetoresistance of a SrSi<sub>2</sub> film ( $d = 30$  nm) at  $T = 2$  K in magnetic field parallel to the current.

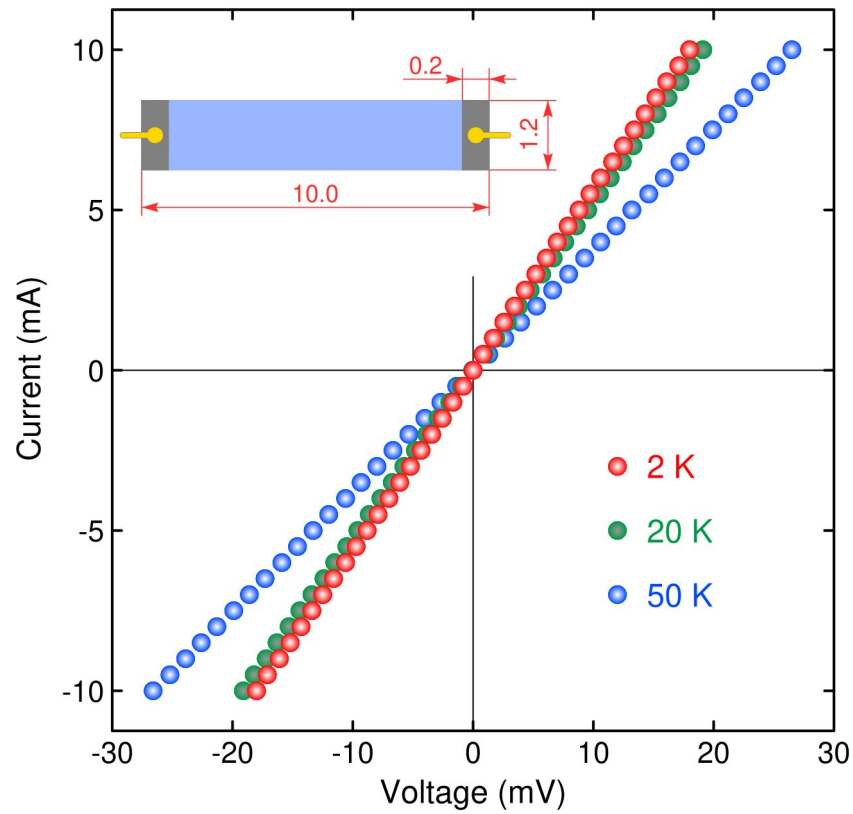

**Figure S18.** Two-terminal measurements of I-V characteristics in a thick SrSi<sub>2</sub> film ( $d = 160$  nm) at 2 K (red), 20 K (green), and 50 K (blue) demonstrating an ohmic behavior. Inset shows a scheme of the measurements – the sample (blue) and the contact areas (grey); the distances are given in mm.
